# Supplementary material
Source: PubMed Central journal article supplement (PMC1088349)

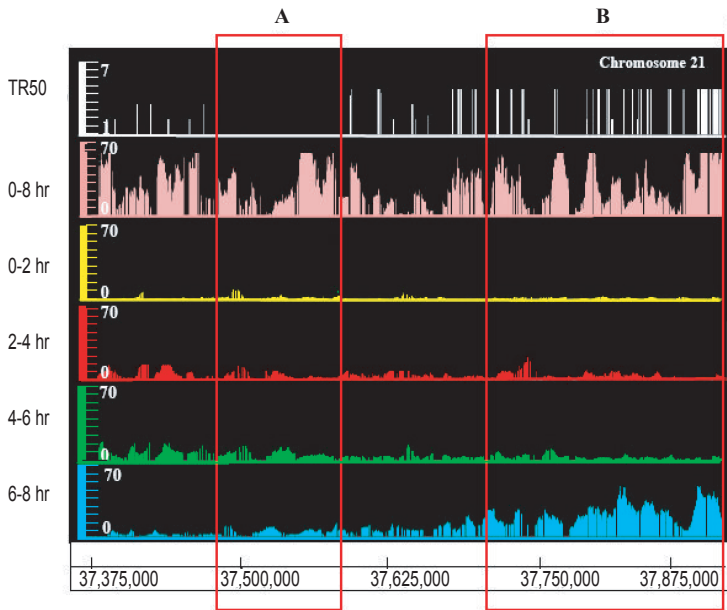

Supplement: pnas_102_18_6419__2.pdf [file pnas_102_18_6419__2.pdf]

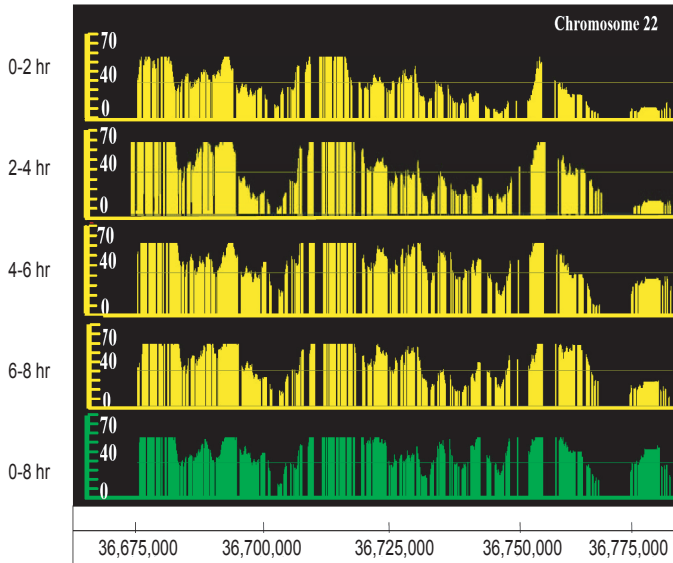

Supplement: pnas_102_18_6419__3.pdf [file pnas_102_18_6419__3.pdf]

RP4-671014 (Early)

RP1-5O6 (pan-S)

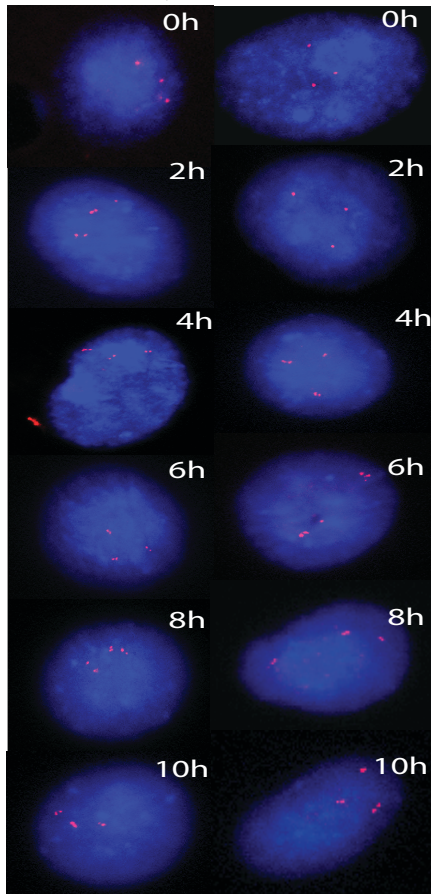

Supplement: pnas_102_18_6419__4.pdf [file pnas_102_18_6419__4.pdf]

**A**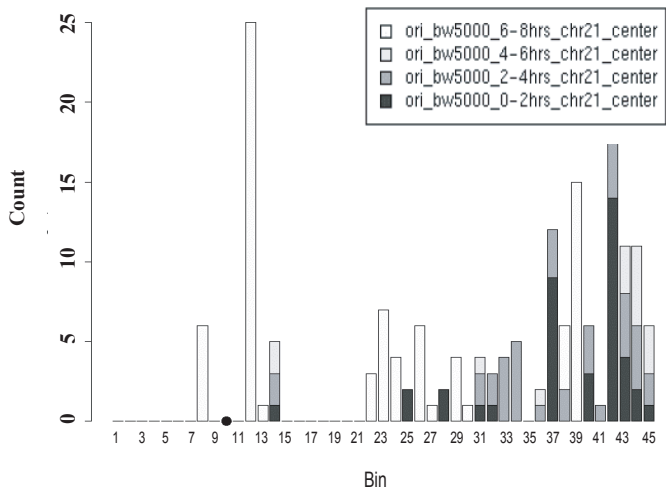**B**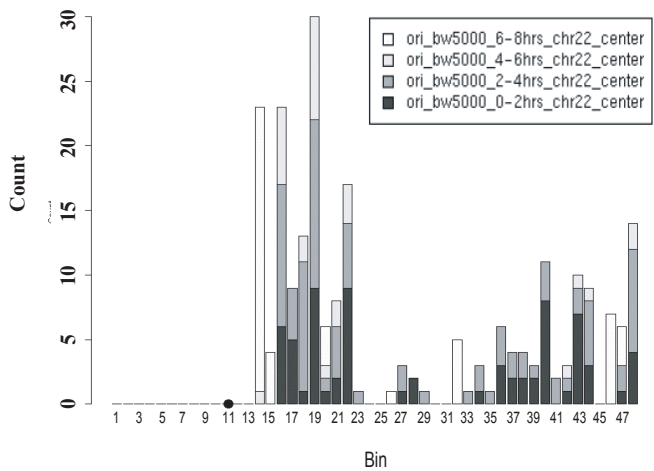

Supplement: pnas_102_18_6419__5.pdf [file pnas_102_18_6419__5.pdf]

**A**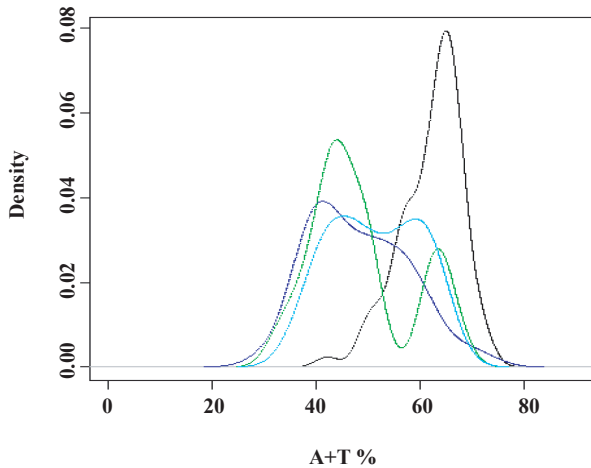**B**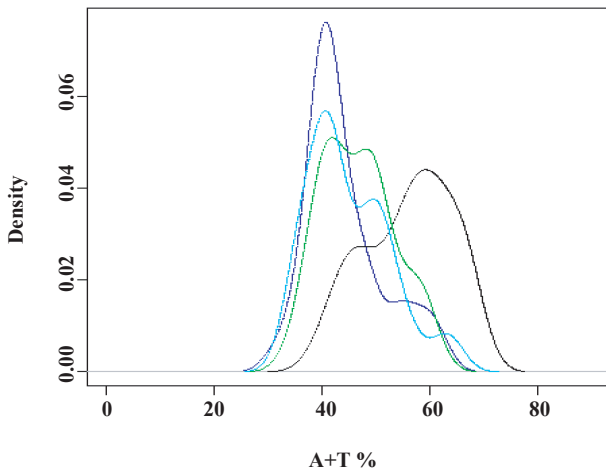

Supplement: pnas_102_18_6419__6.pdf [file pnas_102_18_6419__6.pdf]
